# Supplementary material for: Isolation of Vascular Wall Mesenchymal Stem Cells from the Thoracic Aorta of Adult Göttingen Minipigs: A New Protocol for the Simultaneous Endothelial Cell Collection
Source: MDPI journal article supplement (doi:10.3390/ani13162601), 2023-08-12
Supplement: s1 [file s1]

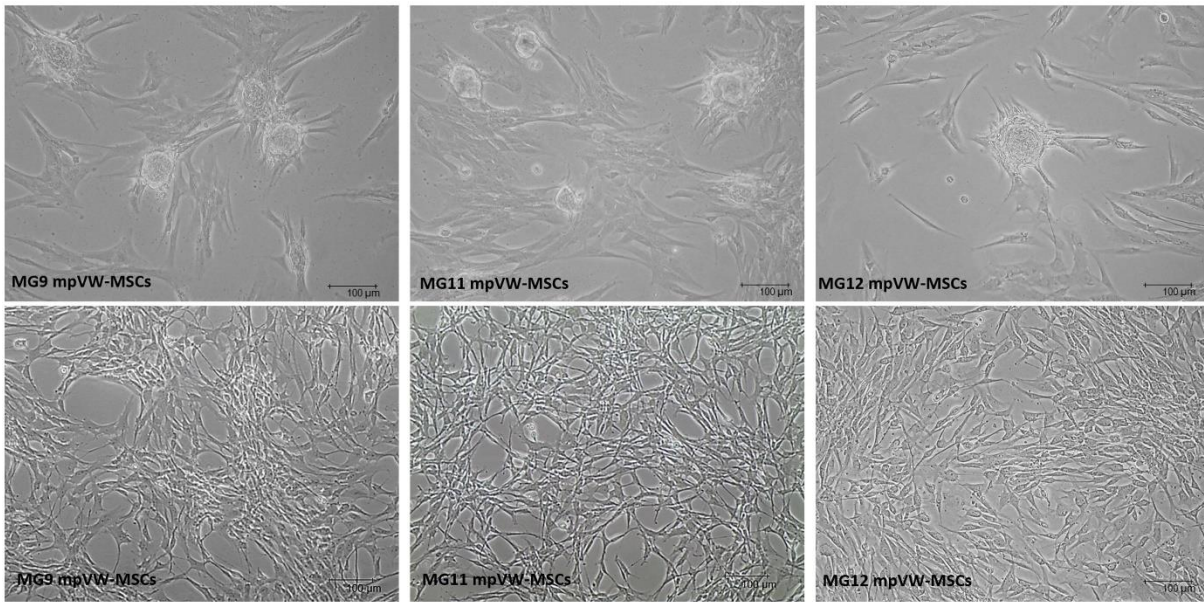

**Figure S1.** Representative images of mpVW-MSCs from the three primary cell lines (MG9, MG11, MG12 respectively). Scale bar 100 µm.
